# Supplementary material for: Composition and Antioxidant Activities of Volatile Organic Compounds in Radiation-Bred Coreopsis Cultivars
Source: PubMed Central journal article supplement (PMC7356690; doi:10.3390/plants9060717), 2020-06-04
Supplement: plants-09-00717-s001.pdf [file plants-09-00717-s001.pdf]

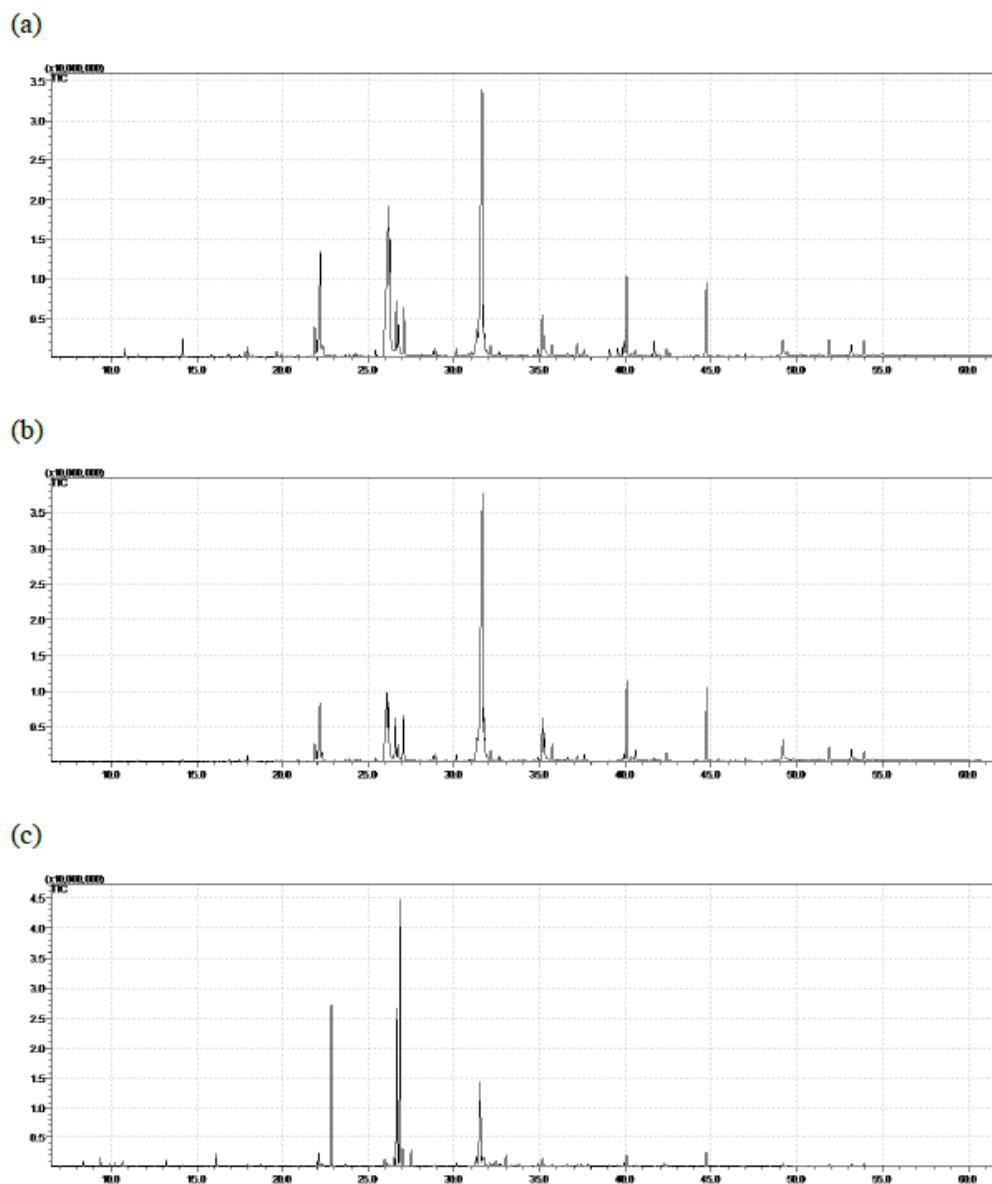

Figure S1. GC-MS chromatograms of the dichloromethane extract of (a) 'golden ring', (b) 'pumpkin pie' and (c) 'snow chrysanthemum'.

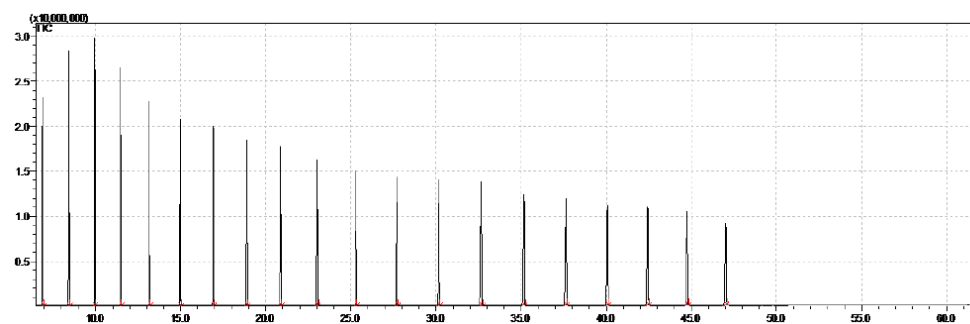

Figure S2. GC-MS chromatograms of n-alkane standard.
